# Supplementary material for: Malnutrition awareness and its determinants among Chinese older adults: findings from a cross-sectional survey
Source: Frontiers journal article supplement (doi:10.3389/fpubh.2025.1638285), 2025-08-20
Supplement: Data_Sheet_1.pdf [file Data_Sheet_1.pdf]

# Survey on awareness of geriatric syndromes

## Case Report Form

**Z1 Short spelling of subject's name:**□□□□

**Z2 Subject number:**□□□□□□

**Z3 Subject contact cell phone:** \_\_\_\_\_

**Z4 Center Code:**□

**Z5 Investigated units:** \_\_\_\_\_

**Z6 Evaluated date:** \_\_\_\_\_

## Case Screening

|                                                                                                                                                                                                                                                                                                                                                                              |                                                                                  |                                                                                  |
|------------------------------------------------------------------------------------------------------------------------------------------------------------------------------------------------------------------------------------------------------------------------------------------------------------------------------------------------------------------------------|----------------------------------------------------------------------------------|----------------------------------------------------------------------------------|
| <b>Inclusion criteria:</b><br>Based on the medical history and physical examination, please confirm the following by ticking " <input type="checkbox"/> ".                                                                                                                                                                                                                   | Yes                                                                              | No                                                                               |
| 1、 Age $\geq$ 65 years old, gender is not limited;<br>2、 Voluntary signing of informed consent and participation in surveys;<br><br><b>If the answer to any of the above is "no", the subject will not be allowed to enter the study.</b>                                                                                                                                    | <input type="checkbox"/><br><input type="checkbox"/>                             | <input type="checkbox"/><br><input type="checkbox"/>                             |
| <b>Exclusion Criteria:</b><br>Based on the medical history and physical examination, please confirm the following by ticking " <input type="checkbox"/> ".                                                                                                                                                                                                                   | Yes                                                                              | No                                                                               |
| 1. A history of serious mental illness;<br>2. Severe visual, hearing or communication impairment;<br>3. Inability to cooperate in completing the evaluation of the full questionnaire;<br><br><b>If the answer to any of the above is "yes", the subject will not be allowed to enter the study.</b>                                                                         | <input type="checkbox"/><br><input type="checkbox"/><br><input type="checkbox"/> | <input type="checkbox"/><br><input type="checkbox"/><br><input type="checkbox"/> |
| <p>According to the inclusion criteria for qualified subjects in clinical trials, subjects can be selected as qualified subjects for the current clinical trial if all 1-2 of the above inclusion criteria are "yes" and all 1-3 of the exclusion criteria are "no".</p> <p>Was the subject enrolled?      <input type="checkbox"/> Yes      <input type="checkbox"/> No</p> |                                                                                  |                                                                                  |

## A Basic information

|                                                                                                                                                                                                                                                                                        |                              |
|----------------------------------------------------------------------------------------------------------------------------------------------------------------------------------------------------------------------------------------------------------------------------------------|------------------------------|
| A01 Gender: 1=Male 2=Female                                                                                                                                                                                                                                                            | <input type="checkbox"/> A1  |
| A02 Date of Birth: _____                                                                                                                                                                                                                                                               | □□□□□A2                      |
| A03 Age: ____ years old                                                                                                                                                                                                                                                                | □□□ A3                       |
| A04 Ethnicity: 1=Han Chinese 2=Other                                                                                                                                                                                                                                                   | <input type="checkbox"/> A4  |
| A05 Marital status: 1=Unmarried 2=Living together in marriage 3=Live apart in marriage 4=Divorced 5=Widowed 6=Other                                                                                                                                                                    | <input type="checkbox"/> A5  |
| A06 Living situation: 1=Living alone 2=Living with another person (spouse, relative or child, etc.) 3=Living with a caregiver who is not related in any way 4=Nursing home 5=Other                                                                                                     | <input type="checkbox"/> A6  |
| A07 Educational level: 1=Illiteracy 2=Primary school 3=Junior school 4=High school or three-year college 5=University 6=Graduate school and above                                                                                                                                      | <input type="checkbox"/> A7  |
| A08 Employment status: 1=Incumbency 2=Retirement                                                                                                                                                                                                                                       | <input type="checkbox"/> A8  |
| A09 Main medical payment methods: 1=Basic medical insurance for urban workers 2=Basic medical insurance for urban residents 3=Rural cooperative medical care 4=Commercial medical insurance 5=Indigent assistance 6=Fully publicly funded 7=Fully self-funded 8=Other social insurance | <input type="checkbox"/> A9  |
| A10 Source of respondents: 1=Urban 2=Rural                                                                                                                                                                                                                                             | <input type="checkbox"/> A10 |
| A11 How would you say your income situation is compared to those around you: 1=High 2=Average 3=Low                                                                                                                                                                                    | <input type="checkbox"/> A11 |
| A12 Smoking status: 1=Yes 2=No 3=Quit smoking                                                                                                                                                                                                                                          | <input type="checkbox"/> A12 |
| A13 Drinking status: 1=Yes 2=No 3=Quit drinking                                                                                                                                                                                                                                        | <input type="checkbox"/> A13 |
| A14 Height (cm)                                                                                                                                                                                                                                                                        | □□□ A14                      |
| A15 Weight (kg)                                                                                                                                                                                                                                                                        | □□□. □A15                    |

## B Disease Information

|                                                                                                                                                                                                                                                                                                                                                                                                                                                                                                                                                                                                                                                                                                                                                                     |                                                                                                                                                                                                                                                                                                                                                                                                                                                                                                                                                                                                                                                               |
|---------------------------------------------------------------------------------------------------------------------------------------------------------------------------------------------------------------------------------------------------------------------------------------------------------------------------------------------------------------------------------------------------------------------------------------------------------------------------------------------------------------------------------------------------------------------------------------------------------------------------------------------------------------------------------------------------------------------------------------------------------------------|---------------------------------------------------------------------------------------------------------------------------------------------------------------------------------------------------------------------------------------------------------------------------------------------------------------------------------------------------------------------------------------------------------------------------------------------------------------------------------------------------------------------------------------------------------------------------------------------------------------------------------------------------------------|
| <b>Diseases of the cardiovascular system</b><br><br>coronary heart disease    1=Yes 2=No <input type="checkbox"/> B1<br>high blood pressure        1=Yes 2=No <input type="checkbox"/> B2<br>heart failure                1=Yes 2=No <input type="checkbox"/> B3<br><br>heart valve disease        1=Yes 2=No <input type="checkbox"/> B4<br>arrhythmia                  1=Yes 2=No <input type="checkbox"/> B5<br><br><b>Respiratory diseases</b><br><br>chronic obstructive pulmonary disease (COPD)    1=Yes 2=No <input type="checkbox"/> B6<br>bronchitis                  1=Yes 2=No <input type="checkbox"/> B7<br><br>inflammation of the lungs    1=Yes 2=No <input type="checkbox"/> B8<br>pulmonary nodule        1=Yes 2=No <input type="checkbox"/> B9 | <b>Tumor Diseases</b><br><br>benign tumor              1=Yes 2=No <input type="checkbox"/> B20<br>malignant tumor          1=Yes 2=No <input type="checkbox"/> B21<br><br><b>Endocrine system diseases</b><br>diabetes                    1=Yes 2=No <input type="checkbox"/> B22<br>Hyperthyroidism or hypothyroidism    1=Yes 2=No <input type="checkbox"/> B23<br>high blood fat disease    1=Yes 2=No <input type="checkbox"/> B24<br>gout                        1=Yes 2=No <input type="checkbox"/> B25<br><br><b>Diseases of the blood system</b><br>anemic                      1=Yes 2=No <input type="checkbox"/> B26<br><br><b>Musculoskeletal</b> |
|---------------------------------------------------------------------------------------------------------------------------------------------------------------------------------------------------------------------------------------------------------------------------------------------------------------------------------------------------------------------------------------------------------------------------------------------------------------------------------------------------------------------------------------------------------------------------------------------------------------------------------------------------------------------------------------------------------------------------------------------------------------------|---------------------------------------------------------------------------------------------------------------------------------------------------------------------------------------------------------------------------------------------------------------------------------------------------------------------------------------------------------------------------------------------------------------------------------------------------------------------------------------------------------------------------------------------------------------------------------------------------------------------------------------------------------------|

Survey on awareness of geriatric syndromes CRF

|                                         |            |                              |                               |            |                              |
|-----------------------------------------|------------|------------------------------|-------------------------------|------------|------------------------------|
| <b>Diseases of the digestive system</b> |            |                              | <b>system</b>                 |            |                              |
|                                         |            |                              | osteoporosis                  | 1=Yes 2=No | <input type="checkbox"/> B27 |
| Gastrointestinal bleeding               | 1=Yes 2=No | <input type="checkbox"/> B10 | osteoarthrosis                | 1=Yes 2=No | <input type="checkbox"/> B28 |
| Liver Diseases                          | 1=Yes 2=No | <input type="checkbox"/> B11 | <b>Psychosomatic diseases</b> |            |                              |
| peptic ulcer                            | 1=Yes 2=No | <input type="checkbox"/> B12 | apprehensive                  | 1=Yes 2=No | <input type="checkbox"/> B29 |
| Pancreatic Diseases                     | 1=Yes 2=No | <input type="checkbox"/> B13 | despondent                    | 1=Yes 2=No | <input type="checkbox"/> B30 |
| <b>Diseases of the urinary system</b>   |            |                              | delirium                      | 1=Yes 2=No | <input type="checkbox"/> B31 |
| Chronic renal insufficiency             | 1=Yes 2=No | <input type="checkbox"/> B14 |                               |            |                              |
| prostate enlargement                    | 1=Yes 2=No | <input type="checkbox"/> B15 |                               |            |                              |
| <b>Diseases of the nervous system</b>   |            |                              |                               |            |                              |
| dementia                                | 1=Yes 2=No | <input type="checkbox"/> B16 |                               |            |                              |
| cerebral hemorrhage                     | 1=Yes 2=No | <input type="checkbox"/> B17 |                               |            |                              |
| Parkinson's disease                     | 1=Yes 2=No | <input type="checkbox"/> B18 |                               |            |                              |
| seizures                                | 1=Yes 2=No | <input type="checkbox"/> B19 |                               |            |                              |

### C Medication use

|                                   |            |                              |                                |            |                              |
|-----------------------------------|------------|------------------------------|--------------------------------|------------|------------------------------|
| antihypertensive drug             | 1=Yes 2=No | <input type="checkbox"/> C1  | sedative drug                  | 1=Yes 2=No | <input type="checkbox"/> C14 |
| antiarrhythmic drug               | 1=Yes 2=No | <input type="checkbox"/> C2  | anti-dementia drug             | 1=Yes 2=No | <input type="checkbox"/> C15 |
| digoxin                           | 1=Yes 2=No | <input type="checkbox"/> C3  | sleeping pill                  | 1=Yes 2=No | <input type="checkbox"/> C16 |
| nitrate                           | 1=Yes 2=No | <input type="checkbox"/> C4  | antiparkinsonian               | 1=Yes 2=No | <input type="checkbox"/> C17 |
| statin (loanword)                 | 1=Yes 2=No | <input type="checkbox"/> C5  | Uric acid-lowering drugs       | 1=Yes 2=No | <input type="checkbox"/> C18 |
| diuretic                          | 1=Yes 2=No | <input type="checkbox"/> C6  | Anti-renal insufficiency drugs | 1=Yes 2=No | <input type="checkbox"/> C19 |
| antiplatelet drug                 | 1=Yes 2=No | <input type="checkbox"/> C7  | Hepatoprotective drugs         | 1=Yes 2=No | <input type="checkbox"/> C20 |
| anticoagulant                     | 1=Yes 2=No | <input type="checkbox"/> C8  | Anti-anemia drugs              | 1=Yes 2=No | <input type="checkbox"/> C21 |
| antihyperglycemic drug            | 1=Yes 2=No | <input type="checkbox"/> C9  | antiasthmatic drug             | 1=Yes 2=No | <input type="checkbox"/> C22 |
| Anti Prostatic Hyperplasia Drugs  | 1=Yes 2=No | <input type="checkbox"/> C10 | anti-infective drugs           | 1=Yes 2=No | <input type="checkbox"/> C23 |
| proton pump inhibitor             | 1=Yes 2=No | <input type="checkbox"/> C11 | Hematological preparations     | 1=Yes 2=No | <input type="checkbox"/> C24 |
| Gastric mucous membrane protector | 1=Yes 2=No | <input type="checkbox"/> C12 | nutrient preparation           | 1=Yes 2=No | <input type="checkbox"/> C25 |
| gastrointestinal stimulant        | 1=Yes 2=No | <input type="checkbox"/> C13 |                                |            |                              |

## D Dementia Knowledge Survey Scale

Please tick the appropriate option according to your understanding.

|                                                                                                                                                                                                                                                     |              |               |                             |
|-----------------------------------------------------------------------------------------------------------------------------------------------------------------------------------------------------------------------------------------------------|--------------|---------------|-----------------------------|
| Did you know that dementia?                                                                                                                                                                                                                         | <b>1=Yes</b> | <b>2 = No</b> | <input type="checkbox"/> D1 |
| If the older adult does not know or answers incorrectly, explain that dementia is a progressive degenerative degenerative disease of the brain, which is mainly characterized by memory impairment and decline in analytical and judgmental skills. |              |               |                             |

| dimension                            | entry                                                                                                                                                                | options |                |        |                             |
|--------------------------------------|----------------------------------------------------------------------------------------------------------------------------------------------------------------------|---------|----------------|--------|-----------------------------|
| symptomatic                          | 1. Do people with dementia suffer from deterioration of speech or even loss of speech?                                                                               | 1=Yes   | 2 = Don't know | 3 = No | <input type="checkbox"/> D2 |
|                                      | 2. Do people with dementia show symptoms of deterioration in executive ability (e.g., inability to dress, cook, etc.)?                                               | 1=Yes   | 2 = Don't know | 3 = No | <input type="checkbox"/> D3 |
| risk factor                          | 3. Are older adults who have had a cerebrovascular accident (e.g., stroke, etc.) more likely to develop dementia?                                                    | 1=Yes   | 2 = Don't know | 3 = No | <input type="checkbox"/> D4 |
|                                      | 4. Are older adults with depression more likely to develop dementia?                                                                                                 | 1=Yes   | 2 = Don't know | 3 = No | <input type="checkbox"/> D5 |
| Prevention and control interventions | 5. Can resistance exercises (e.g., elastic bands, dumbbells, sandbags, etc.) or finger exercises (e.g., massaging palms, rubbing fingertips, etc.) prevent dementia? | 1=Yes   | 2 = Don't know | 3 = No | <input type="checkbox"/> D6 |
|                                      | 6. Can more group-type activities in general prevent dementia?                                                                                                       | 1=Yes   | 2 = Don't know | 3 = No | <input type="checkbox"/> D7 |

## E Frailty Knowledge Survey Scale

Please tick the appropriate option according to your understanding.

|                                                                                                                                                                                                                                          |              |               |                             |
|------------------------------------------------------------------------------------------------------------------------------------------------------------------------------------------------------------------------------------------|--------------|---------------|-----------------------------|
| Are you aware of frailty?                                                                                                                                                                                                                | <b>1=Yes</b> | <b>2 = No</b> | <input type="checkbox"/> E1 |
| If the older person did not know or answered incorrectly, explain that frailty is a state in which the older person's physiological functioning declines and his or her health deteriorates, while becoming more susceptible to disease. |              |               |                             |

| dimension   | entry                                                           | options |                |        |                             |
|-------------|-----------------------------------------------------------------|---------|----------------|--------|-----------------------------|
| symptomatic | 1. Are frail older adults likely to have slower walking speeds? | 1=Yes   | 2 = Don't know | 3 = No | <input type="checkbox"/> E2 |

Survey on awareness of geriatric syndromes CRF

|                                             |                                                                                                                                                                                                                                                                |       |                |        |                             |
|---------------------------------------------|----------------------------------------------------------------------------------------------------------------------------------------------------------------------------------------------------------------------------------------------------------------|-------|----------------|--------|-----------------------------|
|                                             | 2. Is it possible that a frail older person may be unable to accomplish what he or she wants to do because of a lack of physical strength (e.g., not being able to walk continuously for 100 meters alone or climb up a flight of stairs in one breath, etc.)? | 1=Yes | 2 = Don't know | 3 = No | <input type="checkbox"/> E3 |
| <b>risk factor</b>                          | 3. Are older adults with somatic diseases (e.g., coronary heart disease, diabetes, stroke, malignant tumors, etc.) more prone to debility?                                                                                                                     | 1=Yes | 2 = Don't know | 3 = No | <input type="checkbox"/> E4 |
|                                             | 4. Are older adults with adverse emotions such as anxiety and depression more prone to frailty?                                                                                                                                                                | 1=Yes | 2 = Don't know | 3 = No | <input type="checkbox"/> E5 |
| <b>Prevention and control interventions</b> | 5. Is it possible to prevent or ameliorate frailty by ensuring rational use of medication and avoiding polypharmacy as much as possible?                                                                                                                       | 1=Yes | 2 = Don't know | 3 = No | <input type="checkbox"/> E6 |
|                                             | 6. Could better management of multimorbidity coexistence prevent or ameliorate age-related frailty?                                                                                                                                                            | 1=Yes | 2 = Don't know | 3 = No | <input type="checkbox"/> E7 |

## F Sarcopenia Knowledge Survey Scale

Please tick the appropriate option according to your understanding.

|                                                                                                                                                                   |              |               |                             |
|-------------------------------------------------------------------------------------------------------------------------------------------------------------------|--------------|---------------|-----------------------------|
| Do you know about sarcopenia?                                                                                                                                     | <b>1=Yes</b> | <b>2 = No</b> | <input type="checkbox"/> F1 |
| If the older adult did not know or answered incorrectly, explain: Sarcopenia is a state of decreased muscle mass and reduced muscle strength throughout the body. |              |               |                             |

| dimension                                   | entry                                                                                                                   | options |                |        |                             |
|---------------------------------------------|-------------------------------------------------------------------------------------------------------------------------|---------|----------------|--------|-----------------------------|
| <b>symptomatic</b>                          | 1. Is it possible for a person with sarcopenia to have decreased grip strength?                                         | 1=Yes   | 2 = Don't know | 3 = No | <input type="checkbox"/> F2 |
|                                             | 2. Is it possible for a person with sarcopenia to have symptoms of slowed walking speed?                                | 1=Yes   | 2 = Don't know | 3 = No | <input type="checkbox"/> F3 |
| <b>risk factor</b>                          | 3. Are older adults more likely to develop sarcopenia?                                                                  | 1=Yes   | 2 = Don't know | 3 = No | <input type="checkbox"/> F4 |
|                                             | 4. Are older adults with chronic diseases (e.g., diabetes, hyperlipidemia, etc.) more likely to develop sarcopenia?     | 1=Yes   | 2 = Don't know | 3 = No | <input type="checkbox"/> F5 |
| <b>Prevention and control interventions</b> | 5. Does appropriate resistance exercise (e.g., elastic bands, dumbbells, sandbags, etc.) prevent or improve sarcopenia? | 1=Yes   | 2 = Don't know | 3 = No | <input type="checkbox"/> F6 |
|                                             | 6. Does adequate protein intake prevent or improve sarcopenia?                                                          | 1=Yes   | 2 = Don't know | 3 = No | <input type="checkbox"/> F7 |

## G Urinary Incontinence Knowledge Survey Scale

Please tick the appropriate option according to your understanding.

|                                                                                                                               |              |               |                             |
|-------------------------------------------------------------------------------------------------------------------------------|--------------|---------------|-----------------------------|
| Are you aware of urinary incontinence?                                                                                        | <b>1=Yes</b> | <b>2 = No</b> | <input type="checkbox"/> G1 |
| If the older adult does not know or answers incorrectly, explain that urinary incontinence is the uncontrolled flow of urine. |              |               |                             |

| dimension                            | entry                                                                                                          | options |                |        |                             |
|--------------------------------------|----------------------------------------------------------------------------------------------------------------|---------|----------------|--------|-----------------------------|
| symptomatic                          | 1. Is it a sign of urinary incontinence that you urinate so urgently that you can't get to the toilet in time? | 1=Yes   | 2 = Don't know | 3 = No | <input type="checkbox"/> G2 |
|                                      | 2. Is uncontrolled leakage of urine when coughing, sneezing, or exercising a sign of urinary incontinence?     | 1=Yes   | 2 = Don't know | 3 = No | <input type="checkbox"/> G3 |
| risk factor                          | 3. Are women who have more children more likely to have urinary incontinence?                                  | 1=Yes   | 2 = Don't know | 3 = No | <input type="checkbox"/> G4 |
|                                      | 4. Are obese older adults more likely to have urinary incontinence?                                            | 1=Yes   | 2 = Don't know | 3 = No | <input type="checkbox"/> G5 |
| Prevention and control interventions | 5. Should heavy lifting be contraindicated until incontinence symptoms improve?                                | 1=Yes   | 2 = Don't know | 3 = No | <input type="checkbox"/> G6 |
|                                      | 6. Does surgery relieve or treat urinary incontinence?                                                         | 1=Yes   | 2 = Don't know | 3 = No | <input type="checkbox"/> G7 |

## H Malnutrition Knowledge Survey Scale

Please tick the appropriate option according to your understanding.

|                                                                                                                                                                     |              |               |                             |
|---------------------------------------------------------------------------------------------------------------------------------------------------------------------|--------------|---------------|-----------------------------|
| Are you aware of malnutrition?                                                                                                                                      | <b>1=Yes</b> | <b>2 = No</b> | <input type="checkbox"/> H1 |
| If the older adult did not know or answered incorrectly, explain that malnutrition refers to an abnormal state of nutrition, in this case primarily undernutrition. |              |               |                             |

| dimension   | entry                                                                                                                                                                                 | options |                |        |                             |
|-------------|---------------------------------------------------------------------------------------------------------------------------------------------------------------------------------------|---------|----------------|--------|-----------------------------|
| symptomatic | 1. In the absence of deliberate weight loss, is significant weight loss over a period of time (more than 5% in 30 days or more than 10% in 6 months) a possible sign of malnutrition? | 1=Yes   | 2 = Don't know | 3 = No | <input type="checkbox"/> H2 |
|             | 2. Is a significant decrease in muscle mass over time (e.g., muscle atrophy) a possible sign of malnutrition?                                                                         | 1=Yes   | 2 = Don't know | 3 = No | <input type="checkbox"/> H3 |
| risk factor | 3. Are older adults with chronic diseases (e.g., diabetes, hyperlipidemia, etc.) or serious illnesses (e.g., malignant tumors, etc.) more susceptible to malnutrition?                | 1=Yes   | 2 = Don't know | 3 = No | <input type="checkbox"/> H4 |

Survey on awareness of geriatric syndromes CRF

|                                             |                                                                                                                                                               |       |                |        |                             |
|---------------------------------------------|---------------------------------------------------------------------------------------------------------------------------------------------------------------|-------|----------------|--------|-----------------------------|
|                                             | 4. Are older adults with bad moods such as depression and anxiety more likely to be malnourished?                                                             | 1=Yes | 2 = Don't know | 3 = No | <input type="checkbox"/> H5 |
| <b>Prevention and control interventions</b> | 5. Does the daily intake of supplemental proteins such as meat, eggs, milk, beans and soy products prevent or improve malnutrition in the elderly?            | 1=Yes | 2 = Don't know | 3 = No | <input type="checkbox"/> H6 |
|                                             | 6. Is it necessary to use oral nutritional supplementation for malnourished older adults who still do not meet nutritional standards after an intensive diet? | 1=Yes | 2 = Don't know | 3 = No | <input type="checkbox"/> H7 |

## I Falls Knowledge Awareness Survey Scale

Please tick the appropriate option according to your understanding.

|                                                                                                               |              |               |                             |
|---------------------------------------------------------------------------------------------------------------|--------------|---------------|-----------------------------|
| Are you aware of falls?                                                                                       | <b>1=Yes</b> | <b>2 = No</b> | <input type="checkbox"/> I1 |
| If the older adult did not know or answered incorrectly, explain that a fall is a sudden, unintentional fall. |              |               |                             |

| dimension                                   | entry                                                                                                                                                                                  | options |                |        |                             |
|---------------------------------------------|----------------------------------------------------------------------------------------------------------------------------------------------------------------------------------------|---------|----------------|--------|-----------------------------|
| <b>symptomatic</b>                          | 1. Are there symptoms such as dizziness, vertigo, and blurred vision that may precede a fall?                                                                                          | 1=Yes   | 2 = Don't know | 3 = No | <input type="checkbox"/> I2 |
|                                             | 2. Are there symptoms such as loss of balance, feeling of unsteadiness, palpitations, etc. that may precede a fall?                                                                    | 1=Yes   | 2 = Don't know | 3 = No | <input type="checkbox"/> I3 |
| <b>risk factor</b>                          | 3. Are older adults taking certain medications (e.g., sedatives, sleeping pills, hypoglycemics, antiarrhythmics, or antidepressants) more likely to fall than older adults in general? | 1=Yes   | 2 = Don't know | 3 = No | <input type="checkbox"/> I4 |
|                                             | 4. Are older adults who lack awareness of falls and overestimate their abilities more likely to fall?                                                                                  | 1=Yes   | 2 = Don't know | 3 = No | <input type="checkbox"/> I5 |
| <b>Prevention and control interventions</b> | 5. Does the use of walkers and wheelchairs prevent falls?                                                                                                                              | 1=Yes   | 2 = Don't know | 3 = No | <input type="checkbox"/> I6 |
|                                             | 6. Does the installation of fall prevention signs prevent the occurrence of falls?                                                                                                     | 1=Yes   | 2 = Don't know | 3 = No | <input type="checkbox"/> I7 |
